# Supplementary material for: Rationale and Safety Assessment of a Novel Intravaginal Drug-Delivery System with Sustained DL-Lactic Acid Release, Intended for Long-Term Protection of the Vaginal Microbiome
Source: PubMed Central journal article supplement (PMC4836750; doi:10.1371/journal.pone.0153441), 2016-04-19
Supplement: pone.0153441.s005.pdf [file pone.0153441.s005.pdf]

STUDY NAME: DRUG13-LAC

Ring voor vaginale toediening van lactaet

Plaatsing - verwijdering vaginale ring  
 Deel 1 (AN001-002) 06sep14 - 16sep14  
 Deel 2 Cohort 1 (AN003-004) 01dec14 - 08dec14  
 Deel 2 Cohort 2 (AN005-006) 10dec14 - 17dec14

DRUG RESEARCH UNIT GHENT

update: 13JAN15

CLINICAL ADVERSE EVENTS FORM

| Allocation number | Adverse Event                                                                    | Start Date                          | Start Time             | Stop Date                           | Stop Time             | Intensity                | Frequency                                  | *Relationship to study medication | Serious (no / yes) | Duration                           | **Outcome   | ***Action taken with study medication | Comments                               |
|-------------------|----------------------------------------------------------------------------------|-------------------------------------|------------------------|-------------------------------------|-----------------------|--------------------------|--------------------------------------------|-----------------------------------|--------------------|------------------------------------|-------------|---------------------------------------|----------------------------------------|
| 001               | runny nose<br>break through bleeding                                             | 11-Sep-14<br>15-Sep-14              | 7:00<br>7:00           | 12-Sep-14<br>22-Sep-14              | 18:00<br>7:00         | mild<br>mild             | intermittent<br>continuous                 | 1<br>1                            | no<br>no           |                                    | 1<br>1      | 1<br>1                                |                                        |
| 002               | post procedural hemorrhage<br>pressure sensation of lower abdomen<br>pain in jaw | 8-Sep-14<br>8-Sep-14<br>13-Sep-14   | 9:45<br>19:00<br>20:00 | 8-Sep-14<br>9-Sep-14<br>ongoing     | 17:00<br>17:00<br>NAP | mild<br>mild<br>mild     | intermittent<br>intermittent<br>continuous | 1<br>1<br>1                       | no<br>no<br>no     | 7 Hours & 15 Minutes<br>22 Hours   | 1<br>1<br>4 | 1<br>1<br>1                           |                                        |
| 003               | none                                                                             |                                     |                        |                                     |                       |                          |                                            |                                   |                    |                                    |             |                                       |                                        |
| 004               | none                                                                             |                                     |                        |                                     |                       |                          |                                            |                                   |                    |                                    |             |                                       |                                        |
| 005               | vulval irritation<br>vulval irritation                                           | 10-Dec-14<br>10-Dec-14              | 11:00<br>13:31         | 10-Dec-14<br>10-Dec-14              | 13:30<br>14:30        | mild<br>mild             | continuous<br>intermittent                 | 1<br>1                            | no<br>no           | 2 Hours & 30 Minutes<br>59 Minutes | 1<br>1      | 1<br>1                                | procedure related<br>procedure related |
| 006               | vaginal foreign body feeling<br>sore throat<br>bronchitis                        | 10-Dec-14<br>13-Dec-14<br>16-Dec-14 | 21:30<br>14:00<br>9:31 | 11-Dec-14<br>16-Dec-14<br>11-Jan-15 | 7:15<br>9:30<br>8:30  | mild<br>mild<br>moderate | continuous<br>continuous<br>continuous     | 2<br>1<br>1                       | no<br>no<br>no     | 9 Hours & 45 Minutes               | 1<br>1<br>1 | 1<br>1<br>1                           |                                        |

\*Relation to study medication

|   |                        |
|---|------------------------|
| 1 | definitely not related |
| 2 | probably not related   |
| 3 | possibly related       |
| 4 | probably related       |
| 5 | definitely related     |

\*\*Outcome

|   |                                  |
|---|----------------------------------|
| 1 | Recovered/Resolved               |
| 2 | Recovering/Resolving             |
| 3 | Recovered/Resolved with Sequelae |
| 4 | Not Recovered/Not resolved       |
| 5 | Fatal                            |
| 6 | Unknown                          |

\*\*\*Action taken with study medication

|   |                |
|---|----------------|
| 1 | None           |
| 2 | Reduced        |
| 3 | Interrupted    |
| 4 | Discontinued   |
| 5 | Increased      |
| 6 | Not Applicable |
| 7 | Unknown        |

APPROVED BY AC+DB  
 13 JAN. 2015

Prof. dr. H. Verstraelen  
 1-46454-16-001  
 Vrouwenkliniek  
 UZ - GENT  
 04 FEB 2015
